# Supplementary material for: Semiconducting SnO2 nanoparticles for surface-enhanced Raman scattering applications
Source: Royal Society of Chemistry journal article supplement (doi:10.1039/d5ra08335d), 2026-04-24
Supplement: d5ra08335d2.pdf [file d5ra08335d2.pdf]

### Supplementary Information of images

#### **Semiconducting SnO<sub>2</sub> nanoparticles for surface-enhanced Raman scattering applications**

P. Surya Lakshmi<sup>1§</sup>, B. Mohanarao<sup>1§</sup>, P. Babuji<sup>1</sup>, P V Prakash Madduri<sup>2</sup>, L. Jyothi<sup>3</sup>, P. Gopala Krishna<sup>1</sup>, K. H. Chae<sup>4</sup>, G. S. Chang<sup>5</sup>, and V. Saikiran<sup>1,\*</sup>

<sup>1</sup>Department of Physics, School of Sciences, GITAM deemed to be University, Visakhapatnam, India, 530045.

<sup>2</sup>Department of Sciences, Indian Institute of Information Technology Design and Manufacturing Kurnool, Kurnool 518008, Andhra Pradesh, India.

<sup>3</sup>School of Physics, University of Hyderabad, Hyderabad 500046.

<sup>4</sup>Advanced Analysis Center, Korea Institute of Science and Technology, Seoul 02792, Republic of Korea

<sup>5</sup>Department of Physics and Engineering Physics, University of Saskatchewan, Saskatoon, SK S7N5E2, Canada

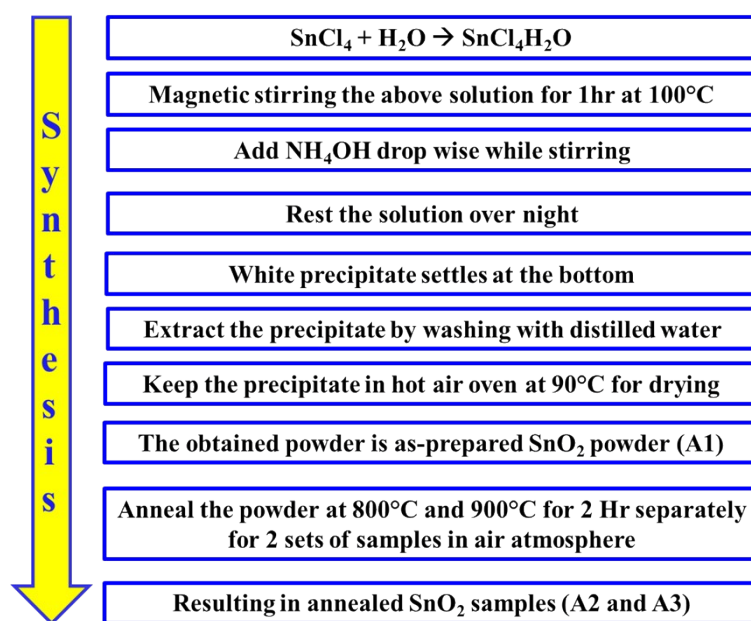

Figure S1: Schematic representation of the sol-gel-assisted precipitation synthesis route followed by thermal annealing to obtain SnO<sub>2</sub> NPs with tunable properties

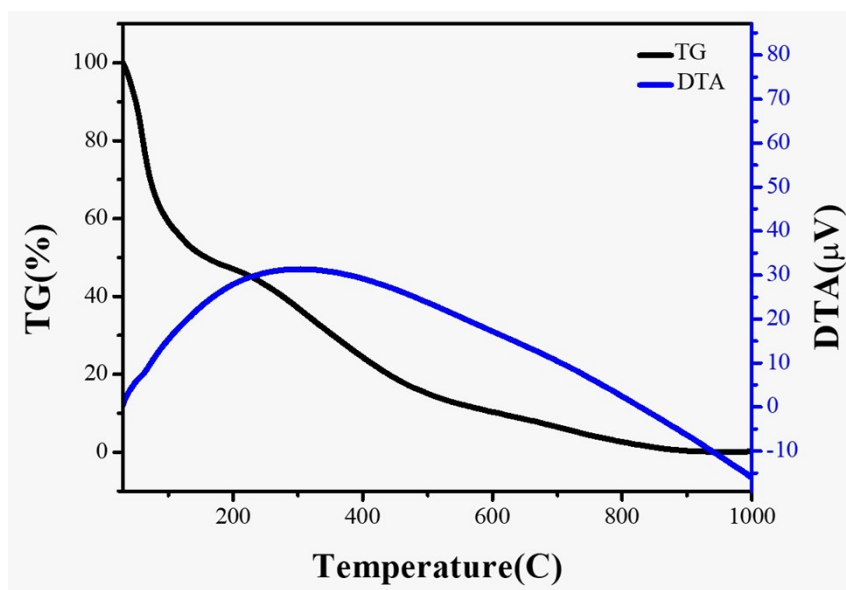

Figure S2: TGA DTA curves of SnO<sub>2</sub> Nanoparticles synthesized.

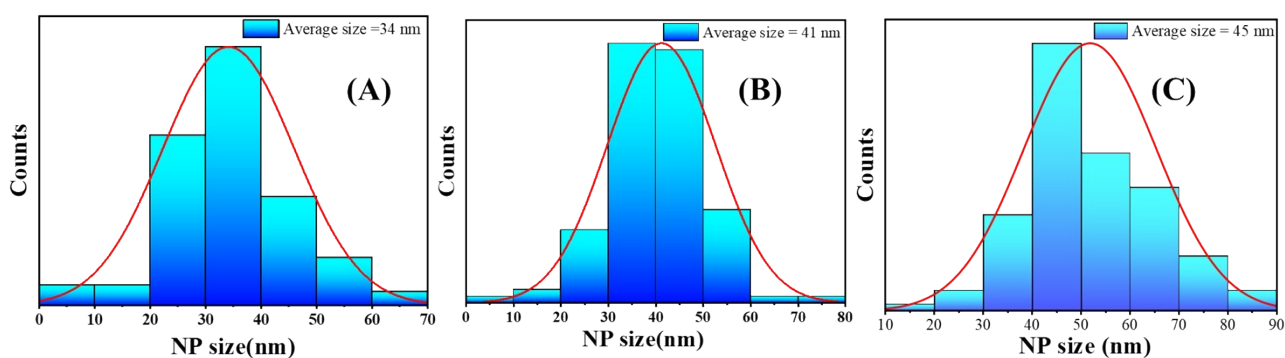

Figure S3: (A) to (C) Size distribution histograms obtained from FESEM images of the SnO<sub>2</sub> NPs samples A1, A2, and A3 respectively.

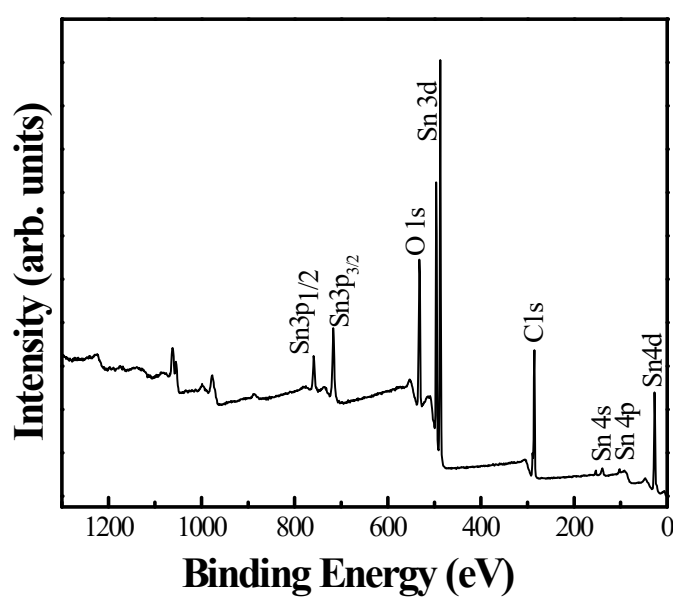

Figure S4: Wide-scan XPS survey of SnO<sub>2</sub> NPs (sample A2)

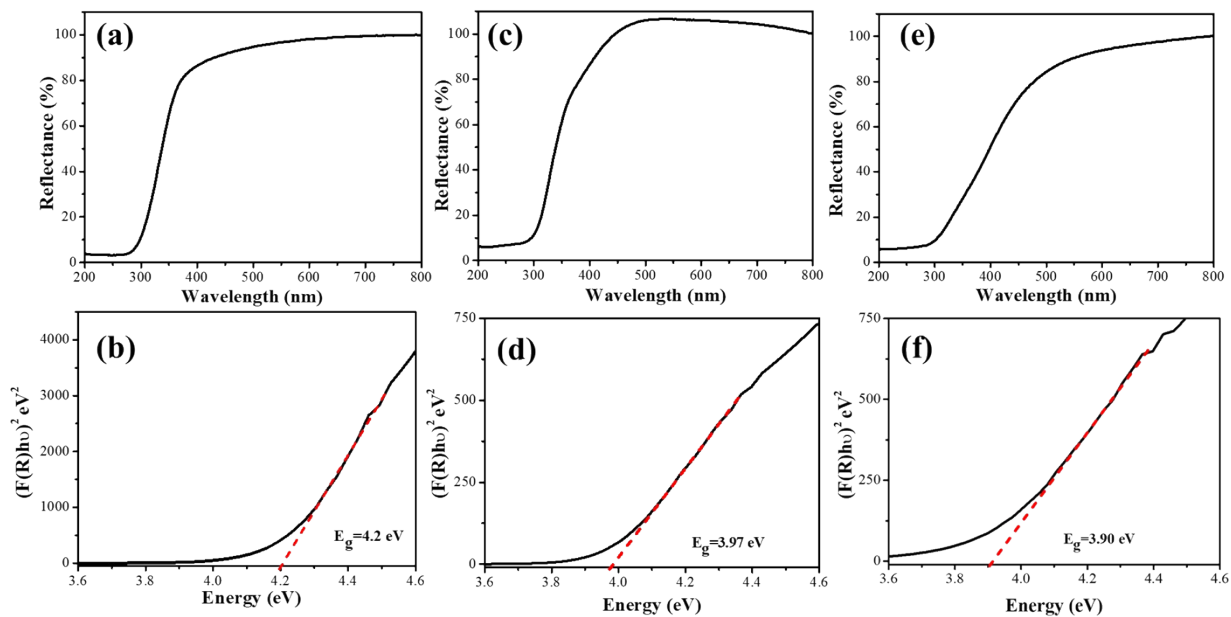

Fig S5: DRS spectra of SnO<sub>2</sub> nanoparticles and the respective band edge estimations. (a) as-prepared (c) 800°C and (e) 900°C annealed SnO<sub>2</sub> NPs and (b), (d), (e) are respective band edge estimations.

Table S1: XRD parameters obtained from Rietveld refinement

|                        |           |
|------------------------|-----------|
| a                      | 4.7376 Å° |
| b                      | 4.7376 Å° |
| c                      | 3.1867 Å° |
| alpha                  | 90°       |
| beta                   | 90°       |
| gamma                  | 90°       |
| X Parameter            | 0.2413    |
| Y Parameter            | 0.3874    |
| Asymm X                | 0.014530  |
| Asymm Y                | 0.005520  |
| Direct Cell Volume     | 71.5235   |
| Bragg R factor         | 3.91      |
| R <sub>f</sub> -factor | 2.38      |
| R <sub>p</sub>         | 9.00      |
| R <sub>wp</sub>        | 11.5      |
| R <sub>exp</sub>       | 67.20     |
| Chi <sup>2</sup>       | 0.304E-01 |

| Element | x       | y       | z       | B | Occ   | Mult |
|---------|---------|---------|---------|---|-------|------|
| Sn      | 0.50000 | 0.50000 | 0.50000 | 0 | 0.125 | 2    |
| O       | 0.80597 | 0.19402 | 0.50000 | 0 | 0.250 | 4    |
